1 **LTD-inducing low frequency stimulation enhances p-Tau181 and**  
2 **p-Tau217 in an age-dependent manner in live rats**

3

4 **Running head: LTD elevates p-Tau181/217 in aged rats**

5

6 **Yangyang Zhang<sup>1,#</sup>, Yin Yang<sup>1,#</sup>, Zhengtao Hu<sup>1,2,#</sup>, Manyi Zhu<sup>1</sup>, Shuangying Qin<sup>1</sup>,**  
7 **Pengpeng Yu<sup>1,3</sup>, Bo Li<sup>1</sup>, Jitian Xu<sup>1</sup>, Michael J. Rowan<sup>3</sup> and Neng-Wei Hu<sup>1,3,\*</sup>**

8

9 <sup>1</sup>Department of Physiology and Neurobiology, School of Basic Medical Sciences,  
10 Zhengzhou University, 100 Science Avenue, Zhengzhou 450001, China

11 <sup>2</sup>Department of Gerontology, The First Affiliated Hospital of Wannan Medical  
12 College, Wuhu 241001, China

13 <sup>3</sup>Department of Pharmacology & Therapeutics and Institute of Neuroscience, Trinity  
14 College, Dublin 2, Ireland

15

16 <sup>#</sup>These authors contributed equally to this work.

17

18 \*Correspondence to Neng-Wei Hu, E-mail: [hunw@tcd.ie](mailto:hunw@tcd.ie)

19

20

21

22

23 **Abbreviations:**

24 AD: Alzheimer's disease

25 A $\beta$ : amyloid- $\beta$  protein

26 A $\beta$ <sub>o</sub>: A $\beta$  oligomers

27 CSF: cerebrospinal fluid

28 Cdk5: cyclin-dependent kinase-5

29 DAPI: 4',6-diamidino-2-phenylindole

30 DG: dentate gyrus

31 DMSO: dimethyl sulfoxide

32 EPSP: excitatory postsynaptic potential

33 GSK3 $\alpha$ : glycogen synthase kinase 3 $\alpha$

34 GSK3 $\beta$ : glycogen synthase kinase 3 $\beta$

35 HFS: high frequency stimulation

36 i.c.v.: intracerebroventricular

37 ISR: integrated stress response

38 LFS: low frequency stimulation

39 LTD: long-term depression

40 LTP: long-term potentiation

41 mGluR5: metabotropic glutamate receptor subtype 5

42 NMDA: N-methyl-D-aspartate

43 NMDAR: N-methyl-D-aspartate receptor

44 PEG400: polyethylene glycol 400

- 45 PMSF: phenylmethylsulfonyl fluoride
- 46 PrP<sup>C</sup>: cellular prion protein
- 47 PVDF: polyvinylidene fluoride
- 48 p-Tau: phosphorylated tau
- 49 SDS: sodium dodecyl sulfate
- 50 TBS-T: tris-buffered saline containing 0.1% Tween 20
- 51

52 **Abstract**

53 The progressive cognitive decline in Alzheimer's disease (AD) patients correlates  
54 with the extent of tau pathology, in particular tau hyperphosphorylation, which is  
55 strongly age-associated. Although elevation of phosphorylated tau (p-Tau) on residues  
56 Thr181 (p-Tau181), Thr217 (p-Tau217), and Thr231 (p-Tau231) in cerebrospinal fluid  
57 or blood are recently proposed to be particularly sensitive markers of early AD, the  
58 generation of p-Tau during brain activity is poorly understood. A major form of  
59 synaptic plasticity, long-term depression (LTD), has recently been linked to the  
60 enhancement of tau phosphorylation. Here we show that low frequency stimulation  
61 (LFS), used to induce LTD, enhances p-Tau181 and p-Tau217 in an age-dependent  
62 manner in the hippocampus of live rats. In contrast, phosphorylation at residues  
63 Thr231, Ser202/Thr205, and Ser396 is less sensitive to LFS. Pharmacological  
64 antagonism of either NMDA or metabotropic glutamate 5 (mGluR5) receptors inhibits  
65 the elevation of both p-Tau181 and p-Tau217. Targeting ageing with a small molecule  
66 cognitive enhancer ISRIB (trans-isomer) prevents the enhancement of p-Tau by LFS  
67 in aged rats. Together, our data provide an *in vivo* means to uncover brain  
68 plasticity-related cellular and molecular processes of tau phosphorylation in health  
69 and ageing conditions.

70

71 **Key words:**

72 ageing / long-term depression / synaptic plasticity / tau phosphorylation

73

74

## 75 **Introduction**

76 Clinical evidence indicates that age-associated progressive cognitive decline in  
77 Alzheimer's disease (AD) patients correlates with the extent of tau pathology, in  
78 particular the degree and nature of tau phosphorylation (Chang *et al*, 2021; Nies *et al*,  
79 2021; Wegmann *et al*, 2019; Wesseling *et al*, 2020). Among the latter, elevation of  
80 phosphorylated tau (p-Tau) on residues of Thr181 (p-Tau181), Thr217 (p-Tau217),  
81 and Thr231 (p-Tau231) in cerebrospinal fluid (CSF) or blood were recently proposed  
82 to be particularly sensitive markers of early AD, long before the diagnosis of clinical  
83 dementia (Barthelemy *et al*, 2020a; Barthelemy *et al*, 2020b; Hansson, 2021; Karikari  
84 *et al*, 2020; O'Connor *et al*, 2020; Palmqvist *et al*, 2021; Wegmann *et al*, 2021). P-Tau  
85 in the brain and its subsequent release into CSF and blood is a dynamic process that  
86 changes during disease evolution. Although reports from various memory clinics  
87 indicate that p-Tau181, p-Tau217, and p-Tau231 distinguish AD from controls with  
88 high accuracy for very early AD diagnosis, the generation of these p-Tau species in  
89 patients' brains, in particular learning and memory processes, is still unclear, mainly  
90 due to ethical and technical limitations.

91 The hippocampus is one of the areas that p-Tau first appears during Braak stage II of  
92 AD (Braak *et al*, 2006) and this region of brain is particularly vulnerable to  
93 age-related changes (Buss *et al*, 2021; Driscoll *et al*, 2003; Ianov *et al*, 2017;  
94 McKiernan & Marrone, 2017; Veldsman *et al*, 2021). Synaptic plasticity mechanisms  
95 at excitatory glutamatergic synapses in hippocampus, including those underlying  
96 long-term depression (LTD), are neurophysiological substrates of normal learning and

97 memory function (Connor & Wang, 2016; Magee & Grienberger, 2020). Interestingly,  
98 recent studies indicate that LTD induction enhances tau phosphorylation at Ser396  
99 (p-Tau396) (Kimura *et al*, 2014; Regan *et al*, 2015) and Ser202/Thr205  
100 (p-Tau202/205) (Taylor *et al*, 2021) in hippocampus *in vitro*. It is still unknown  
101 whether the expression levels of p-Tau181, p-Tau217, and p-Tau231 can also be  
102 enhanced by physiological LTD induction. Whether or not their enhancement is more  
103 sensitive compared with other reported residues and the age-dependence of tau  
104 phosphorylation remains elusive.

105 Both NMDAR and metabotropic glutamate receptors are required for the induction of  
106 most forms of LTD by low frequency conditioning stimulation (LFS) (Collingridge *et*  
107 *al*, 2010). Recent evidence implicates a particular role for extrasynaptic NMDAR (Liu  
108 *et al*, 2013; Papouin *et al*, 2012) and metabotropic glutamate receptor subtype 5  
109 (mGluR5) (Hu *et al*, 2014; Li *et al*, 2009; Luscher & Huber, 2010; O'Riordan *et al*,  
110 2018a), both also involved in tau pathology (Benarroch, 2018; Sun *et al*, 2016;  
111 Tackenberg *et al*, 2013), in LTD induction.

112 Here we investigated whether p-Tau181, p-Tau217, p-Tau231, p-Tau202/205 and  
113 p-Tau396 are affected by the induction of hippocampal LTD by LFS at CA3 to CA1  
114 synapses in the hippocampus of live rats (Hu *et al*, 2014; O'Riordan *et al*, 2018b;  
115 Ondrejcek *et al*, 2019). We assayed the local expression of p-Tau in different  
116 subregions of hippocampus at two different ages (2-3-months and 17-18-months). We  
117 found that electrical LFS preferentially enhanced p-Tau181 and p-Tau217 in an  
118 age-dependent manner without apparently affecting the levels of p-Tau at other

119 residues that were investigated. Further, blocking either NMDARs or mGluR5 with  
120 their selective antagonists strongly inhibited the elevation of both p-Tau181 and  
121 p-Tau217. Finally, targeting ageing with ISRIB (trans-isomer) (Krukowski *et al.*, 2020)  
122 prevented the increase of both p-Tau181 and p-Tau217 by LFS in aged rats. Our data  
123 provide an *in vivo* means to uncover brain plasticity-related cellular and molecular  
124 processes of tau phosphorylation in health and disease.

## 125 **Results**

### 126 **Induction of LTD by LFS enhances p-Tau181, p-Tau217 in an age-dependent** 127 **manner in live rats**

128 Pyramidal neurons in hippocampal CA1 area is one of the fields that p-Tau first  
129 appears during Braak stage II of AD (Braak *et al.*, 2006). Although LFS-triggered tau  
130 phosphorylation at Ser396 (Kimura *et al.*, 2014; Regan *et al.*, 2015) and  
131 Ser202/Thr205 (Taylor *et al.*, 2021) in hippocampal slices has been previously  
132 reported, the effects of LTD-inducing LFS on the expression of p-Tau181, p-Tau217,  
133 and p-Tau231, recently proposed to be particularly sensitive markers of early AD,  
134 have yet to be described. Having developed stimulation protocols to reliably induce  
135 LTD at CA3 to CA1 synapses in live rats (Hu *et al.*, 2014; O'Riordan *et al.*, 2018a, b;  
136 Ondrejcek *et al.*, 2019), we confirmed (Hu *et al.*, 2014) that this protocol (LFS-900,  
137 900 pulses at 1 Hz) triggered a robust persistent form of LTD that, like certain forms  
138 of long-term memory formation, is protein synthesis-dependent (**Figure S1**). We used  
139 the same protocol (LFS-900, 900 pulses at 1 Hz) in this study (**Figure 1a**). To  
140 determine the age-dependence of p-Tau enhancement by LFS, we performed our

141 experiments in rats at two different ages: 2-3 months and 17-18 months. LFS  
142 depressed field EPSPs to  $63.8 \pm 7.8\%$  of baseline in 2-3-month-old rats, and  $62.4 \pm$   
143  $3.4\%$  in 17-18-month-old rats. The magnitude of LFS-induced synaptic depression is  
144 thus comparable at both ages (**Figure 1b,c**).

145 The rats were sacrificed 30 min post-LFS and immunohistochemically processed for  
146 p-Tau181, p-Tau217, p-Tau231, p-Tau202/205, p-Tau396, and total tau analysis (all  
147 antibodies used are in **Table S1** and in the Methods). The expression level of total tau  
148 and p-Tau was measured in whole dorsal hippocampus, CA1, CA3, and the hilus of  
149 dentate gyrus (DG in this study) areas. The expression level in the contralateral  
150 hemisphere was used as the control. Immunofluorescent staining for antibody Tau46  
151 or Tau5 confirmed that application of LFS did not lead to a change in total tau  
152 expression level in both age groups (**Figure S2**). Whereas no difference of p-Tau181  
153 level was apparent in 2-3-month-old (**Figure 1d**), in 17-18-month-old animals tau  
154 phosphorylation at Thr181 was obviously enhanced in all three hippocampal fields  
155 (**Figure 1e**). We then assayed the expression level of p-Tau217 in adjacent brain slices  
156 from the same animals. Similar to p-Tau181, no difference was observed in  
157 2-3-month-old rats (**Figure 2a**), while an enhancement of p-Tau217 was seen in CA1,  
158 CA3, and DG in 17-18-month-old rats (**Figure 2b**). In contrast, the expression levels  
159 of p-Tau231, p-Tau202/205 and p-Tau396 did not appear to change in adjacent brain  
160 slices from young (**Figure S3**) or aged rats overall, with the exception of a significant  
161 enhancement of p-Tau202/205 in the CA1 area of older rats (**Figure S4**).

162 To determine if the changes in p-Tau by LTD-inducing LFS detected using



163 immunohistochemistry referenced to the contralateral hemisphere, we measured the  
164 expression level of the same phospho-tau species using western blotting after the  
165 same conditioning LFS was applied in another cohort of 17-18-month-old rats  
166 (**Figure 3a,b**).  $\beta$ -actin was used to ensure equal protein loading on gels. The total tau  
167 expression level, normalized to  $\beta$ -actin, in either the ipsilateral or contralateral  
168 hippocampus did not differ from age-matched naïve control rats (**Figure S5**).  
169 Consistent with the immunohistochemistry, LTD-inducing LFS significantly enhanced  
170 p-Tau181 (**Figure 3c; Figure S6**) and p-Tau217 (**Figure 3d; Figure S6**) in the  
171 ipsilateral hippocampus, while it had no overall significant effect compared with  
172 naïve controls on the expression level of p-Tau at the other residues investigated  
173 (**Figure S7**). Western blotting indicated that the expression levels of p-Tau181 and  
174 p-Tau217, slightly, although not significantly, also increased in the contralateral  
175 hippocampus when compared with naïve controls. This indicates that application of  
176 LFS activates the commissural pathway sufficiently to enhance the expression levels  
177 of both p-Tau181 and p-Tau217 in parts of the contralateral hippocampus.  
178 Enhanced neuronal activity accelerates tauopathy *in vivo* in tau mouse models (Wu *et*  
179 *al*, 2016) and mechanical injury of neurons induces tau mislocalization to dendritic  
180 spines (Braun *et al*, 2020). In order to exclude any influence of electrode implantation  
181 and baseline recording of evoked field EPSPs on the local expression level of p-Tau,  
182 the same experimental processes were performed but no LFS was applied in another  
183 cohort of 17-18-month-old rats (**Figure S8a,b**). The immunofluorescent staining  
184 results confirmed that no change of p-Tau181 and p-Tau217 levels were present in

185 hippocampus from these rats (**Figure S8c,d**). We thus demonstrate that application of  
186 LFS enhances p-Tau181 and p-Tau217 in an age-dependent manner in live rats. The  
187 enhancement of tau phosphorylation at both residues by LFS appears more sensitive  
188 compared with residues Thr231, Ser202/Thr205, and Ser396.

189 **Antagonists of NMDA receptors or mGluR5 inhibit the elevation of both**  
190 **p-Tau181 and p-Tau217**

191 Previously, we found that the induction of LTD by LFS, was not blocked by standard  
192 systemic doses of either NMDAR or mGluR5 antagonists when applied alone (Hu *et*  
193 *al.*, 2014; O'Riordan *et al.*, 2018b), while combined systemic injection of both  
194 antagonists completely abrogated the induction of synaptic LTD in young adult rats  
195 (O'Riordan *et al.*, 2018b). Therefore, we wondered if synaptic LTD could be blocked  
196 by standard systemic doses of either NMDAR or mGluR5 antagonists when applied  
197 alone in relatively aged (17-18-month-old) rats. Similar to our previous finding in  
198 young rats (Hu *et al.*, 2014; O'Riordan *et al.*, 2018b), a standard systemic dose (10  
199 mg/kg, i.p.) of the competitive NMDAR antagonist CPP which completely blocked  
200 synaptic long-term potentiation (LTP) in CA3-CA1 synapses (**Figure S9**), did not  
201 affect the induction of LTD in aged rats. Thus 1 h post the injection of CPP, the  
202 application of LFS suppressed the field EPSPs to  $70.2 \pm 2.5\%$  in 17-18-month-old rats  
203 (**Figure 4a,b**). Next we tested the standard dose of MTEP (3 mg/kg, i.p.) which is  
204 known to non-competitively block mGluR5, with a rat hippocampal receptor  
205 occupancy of  $> 90\%$  (Busse *et al.*, 2004). The application of LFS induced a depression  
206 of field EPSPs to  $79.6 \pm 3.7\%$  in these MTEP-treated animals (**Figure 4a,b**).

207 Given that neither block of NMDAR with CPP nor block of mGluR5 with MTEP  
208 prevented the induction of LTD in aged rats, we hypothesized that neither of these  
209 treatments on their own would affect the enhancement of p-Tau181 and p-Tau217 by  
210 LFS. To test this, we assessed total tau and p-Tau on both residues in the hippocampus  
211 of the rats treated with CPP or MTEP. Immunofluorescent staining for antibody Tau46  
212 confirmed that neither agent affected total tau expression level after induction of LTD  
213 by LFS in aged rats (**Figure S10**). Surprisingly, even though neither of these  
214 treatments on their own affected the induction of LTD, elevation of p-Tau181 and  
215 p-Tau217 by LFS were abolished/inhibited in both CPP and MTEP-treated aged rats.  
216 After systemic treatment of CPP, the enhancement of p-Tau181 by LFS was strongly  
217 inhibited overall although some enhancement was seen in the CA1 area (**Figure 4c**),  
218 while the elevation of p-Tau217 by LFS was completely abolished (**Figure 4d**).  
219 Somewhat similarly, the elevation of both p-Tau181 and p-Tau217 triggered by LFS  
220 was completely prevented by systemic administration of MTEP (**Figure 4e,f**). CPP is  
221 a competitive NMDAR antagonist, so its ability to block NMDARs depends on the  
222 magnitude of stimulus-evoked transmitter release during the LFS period. This may  
223 help explain why the enhancement of p-Tau181 was resistant to CPP in the CA1 area.  
224 Together, these findings indicate that increases of p-Tau181 and p-Tau217 triggered  
225 by LFS needs the co-activation of mGluR5 and NMDARs.

226 **Targeting ageing with a small molecule cognitive enhancer ISRIB blocks the**  
227 **enhancement of p-Tau181 and p-Tau217 by LFS in aged rats**

228 Given that induction of LTD by LFS enhances p-Tau181 and p-Tau217 in an

229 age-dependent manner and ageing is the greatest risk factor for AD (Hou *et al.*, 2019),  
230 we hypothesized that targeting ageing might prevent the elevation of p-Tau181 and  
231 p-Tau217 by LFS. Very recently, Krukowski *et al.* discovered that the small molecule  
232 cognitive enhancer ISRIB reverses age-associated changes in hippocampal neuron  
233 function (Krukowski *et al.*, 2020). To test this hypothesis, we treated relatively aged  
234 (17-18-month-old) rats with the same ISRIB treatment paradigm of daily injections on  
235 3 consecutive days as reported (Krukowski *et al.*, 2020), and *in vivo*  
236 electrophysiological experiments were carried out on these animals 18 days after the  
237 last injection of ISRIB (**Figure 5a**). LFS induced stable and robust LTD in all these  
238 rats (**Figure 5b,c**). Immunofluorescent staining for antibody Tau46 confirmed that  
239 induction of LTD by LFS did not lead to a change in total tau expression level in  
240 ISRIB-treated rats (**Figure S11**). Intriguingly, neither p-Tau181 (**Figure 5d**) nor  
241 p-Tau217 (**Figure 5e**) were increased by the same LFS conditioning protocol which  
242 triggered enhancement of both p-Tau181 and p-Tau217 in untreated age-matched rats  
243 (**Figure 1e** and **Figure 2b**).

## 244 **Discussion**

245 This study reveals that ageing enables the elevation of p-Tau181 and p-Tau217  
246 triggered by LTD-inducing conditioning stimulation in live rats. Growing evidence  
247 from many different memory center cohorts indicates that p-Tau181 and p-Tau217  
248 distinguish AD from controls with high accuracy very early in the disease process  
249 (Hansson, 2021; Teunissen *et al.*, 2022). These findings encourage the prospect that  
250 these markers are good enough to become early AD diagnostic tools. Our data provide

251 a novel *in vivo* means to uncover brain plasticity-related cellular and molecular  
252 processes of tau phosphorylation at these key sites in health and ageing.  
253 Because LTD induction by LFS at CA3-CA1 synapses in the hippocampus usually  
254 necessitates transient elevated synaptic glutamate release and subsequent activation of  
255 NMDARs and/or mGluRs (Collingridge *et al.*, 2010), we wondered if the enhanced  
256 tau phosphorylation triggered by LFS entails these receptors also. Pretreatment with  
257 either the NMDAR or mGluR5 antagonist alone completely abrogated the  
258 LFS-induced tau phosphorylation, indicating that both receptors need to be activated  
259 to trigger enhanced p-Tau181 and p-Tau217. Although we only examined one time  
260 point, it is clear that LFS triggers an NMDAR and mGluR5-dependent increase in tau  
261 phosphorylation that persists for at least 30 min in all hippocampal subfields  
262 examined. Whereas the induction of *in vivo* LTD is only blocked by combined  
263 pretreatment with standard doses of CPP and MTEP (O’Riordan *et al.*, 2018b),  
264 injecting either agent alone (Hu *et al.*, 2014; O’Riordan *et al.*, 2018b) prevented  
265 LFS-triggered tau phosphorylation. In view of these findings, it seems unlikely that  
266 enhanced tau phosphorylation at either residues Thr181 or Thr217 is essential for  
267 LTD at CA3-CA1 synapses. Also, it remains to be determined if the LFS protocol  
268 used in the present study triggers LTD at CA3 recurrent collaterals or back  
269 projections as reported previously (Debanne *et al.*, 1998). Recent evidence implicates  
270 a particular role for extrasynaptic NMDAR in LTD induction (Liu *et al.*, 2013;  
271 Papouin *et al.*, 2012). In the hippocampal CA1 area, mGluR5 is found predominantly  
272 located perisynaptically and extrasynaptically on postsynaptic spines of pyramidal

273 cells (Lujan *et al.*, 1996; Lujan *et al.*, 1997). Co-activation of mGluR5 with NMDARs  
274 located in this vicinity is known to strongly enhance the function of the NMDARs, in  
275 particular GluN2B-containing NMDARs (Kotecha *et al.*, 2003; Sarantis *et al.*, 2015).  
276 Numerous studies have shown that synaptic NMDARs are mainly involved in normal  
277 cognitive function, while extrasynaptic NMDARs are important mediators of  
278 neurotoxicity (Vieira *et al.*, 2020). Glutamate-induced excitotoxicity increases tau  
279 phosphorylation (Sindou *et al.*, 1994) and more recent evidence indicates the  
280 involvement of extrasynaptic NMDARs activation in tau pathology (Sun *et al.*, 2016;  
281 Tackenberg *et al.*, 2013). Tau is phosphorylated at many different sites by different  
282 protein kinases. Both glycogen synthase kinase 3 $\beta$  (GSK3 $\beta$ ) and cyclin-dependent  
283 kinase-5 (Cdk5) can phosphorylate tau at Thr181 and Thr217 (Liu *et al.*, 2002). The  
284 activity of GSK3 $\beta$  is significantly enhanced during hippocampal LTD (Peineau *et al.*,  
285 2007) but very recent evidence indicates the involvement of GSK3 $\alpha$  in both  
286 NMDAR-dependent (Draffin *et al.*, 2021) and mGluR5-dependent (McCamphill *et al.*,  
287 2020) LTD. Cdk5 activation appears to be required for NMDAR-dependent LTD at  
288 CA3-CA1 synapses also (Mishiba *et al.*, 2014).  
289 Ageing is the primary risk factor for most neurodegenerative diseases including AD  
290 (Hou *et al.*, 2019). Age-related reduction in glutamate uptake is associated with  
291 extrasynaptic NMDAR and mGluR activation at hippocampal CA1 synapses (Potier  
292 *et al.*, 2010). Very recent evidence indicates that imbalanced synaptic weights underlies  
293 the aberrant elevated firing characteristics of both CA3 and CA1 pyramidal neurons in  
294 aged, learning impaired rats (Buss *et al.*, 2021). Intriguingly, Krukowski *et al.*

295 discovered that a small molecule cognitive enhancer ISRIB reverses the aberrantly  
296 elevated integrated stress response (ISR) in aged mice brain and restores age-related  
297 changes in hippocampal neuron function (Krukowski *et al.*, 2020). In the present  
298 study, the same ISRIB treatment paradigm successfully prevented the elevation of  
299 both p-Tau181 and p-Tau217 by LFS in aged rats. Although the detailed mechanisms  
300 of how ISRIB prevents tau phosphorylation remain to be elucidated, given that ageing  
301 is the single strongest risk factor for AD, targeting ageing is likely to provide novel  
302 therapeutic avenues for AD (Livingston *et al.*, 2020).

303 Previous reports indicate that p-Tau396 can be enhanced by LFS-900 (1 Hz) in acute  
304 hippocampal slices (Kimura *et al.*, 2014; Regan *et al.*, 2015). In contrast, no change in  
305 p-Tau202/205 was triggered by LFS except under the extreme condition of 2 hours  
306 LTD induction over a period of 7 days in slice cultures (Taylor *et al.*, 2021). The  
307 experimental conditions used to detect changes in p-Tau396 in hippocampal slices  
308 differ very significantly from our live brain studies, including relatively young age  
309 and non-physiological temperature. It is well recognized that p-Tau is  
310 developmentally regulated (Bramblett *et al.*, 1993; Brion *et al.*, 1993; Goedert *et al.*,  
311 1993; Hefti *et al.*, 2019; Yu *et al.*, 2009) and can be hypothermia-induced (Avila &  
312 Diaz-Nido, 2004; Bretteville *et al.*, 2012; Gratuze *et al.*, 2017; Planel *et al.*, 2004).

313 Although not statistically significant, we found slight elevation of p-Tau396 triggered  
314 by LFS-900 *in vivo* in this study. Nevertheless, future studies should elucidate if, like  
315 the present *in vivo* studies, changes in p-Tau181 and p-Tau217 are more sensitive to  
316 LTD-inducing LFS *in vitro*. Phosphorylated tau species have faster tau turnover rates

317 and shorter half-lives in cultured human and rodent neurons compared with that in  
318 human and rodent brains (Sato *et al*, 2018). Thus, our findings in live animals provide  
319 a valuable experimental model to directly study the generation of p-Tau during  
320 learning and memory-related synaptic plasticity and to help develop clinical  
321 biomarkers of AD.

322 Further highlighting that AD is a chronic disease, it is feasible to carry out more  
323 detailed time course analysis of phosphorylated tau in our live animal models. To  
324 conclude, our data in this study show that, similar to clinical biomarker findings, tau  
325 phosphorylation is preferentially triggered at certain sites including Thr181 and  
326 Thr217 by LTD-inducing conditioning stimulation in aged brain in live rats. Given  
327 current technical and ethical barriers to tau detection in live patient's brain, our  
328 experimental models provide a valuable means to (1) directly study the generation of  
329 p-Tau during learning and memory-related synaptic plasticity, (2) help optimize the  
330 choice of p-Tau as biomarkers, and (3) aid in the selection of p-Tau directed therapies  
331 in future clinical trials of AD.

## 332 **Materials and Methods**

### 333 **Animals**

334 All experiments were performed following the guidelines of the ARRIVE (Animal  
335 Research: Reporting of In Vivo Experiments) guidelines 2.0 (Percie du Sert *et al*,  
336 2020) and were approved by the Animal Care and Use Committee of Zhengzhou  
337 University, China. All efforts were made to minimize the number of animals used and  
338 their suffering.



339 Young adult (2-3-month-old), and aged (17-18-month-old) male Sprague Dawley rats  
340 were provided by the Laboratory Animal Center of Zhengzhou University. The  
341 animals were housed under a 12 h light-dark cycle at room temperature (19-22°C)  
342 with continuous access to food and water *ad libitum*. Prior to the acute experiments,  
343 animals were anaesthetized with urethane (1.5-1.6 g/kg, i.p.). Lignocaine (10 mg, 1%  
344 adrenaline, s.c.) was injected over the area of the skull where electrodes and screws  
345 were to be implanted. The body temperature of the rats was maintained at 37-38°C  
346 with a feedback-controlled heating blanket during the whole period of surgery and  
347 recording.

#### 348 **Electrophysiology**

349 Electrodes were made and implanted as described previously (Hu *et al.*, 2014). Briefly,  
350 monopolar recording electrodes were constructed from Teflon-coated tungsten wires  
351 (75 µm inner core diameter, 112 µm external diameter) and twisted bipolar  
352 stimulating electrodes were constructed from Teflon-coated tungsten wires (50 µm  
353 inner core diameter, 75 µm external diameter) separately. Field excitatory  
354 postsynaptic potentials (EPSPs) were recorded from the stratum radiatum in the CA1  
355 area of left or right hippocampus in response to stimulation of the Schaffer  
356 collateral-commissural pathway. Electrode implantation sites were identified using  
357 stereotaxic coordinates relative to bregma, with the recording site located 3.4 mm  
358 posterior to bregma and 2.5 mm lateral to midline, and stimulating site 4.2 mm  
359 posterior to bregma and 3.8 mm lateral to midline. The final placement of electrodes  
360 was optimized by using electrophysiological criteria and confirmed via postmortem

361 analysis.

362 Test EPSPs were evoked by a single square wave pulse (0.2 ms duration) at a  
363 frequency of 0.033 Hz and an intensity that triggered a 50% maximum EPSP response.

364 LTD was induced using 1 Hz low frequency stimulation (LFS) consisting of 900  
365 pulses (0.2 ms duration). During the LFS the intensity was raised to trigger EPSPs of  
366 95% maximum amplitude. LTP was induced using 200 Hz high frequency stimulation  
367 (HFS) consisting of one set of 10 trains of 20 pulses (inter-train interval of 2 s). The  
368 stimulation intensity was raised to trigger EPSPs of 75% maximum during the HFS.

369 None of the conditioning stimulation protocols elicited any detectable abnormal  
370 changes in background EEG, which was recorded from the hippocampus throughout  
371 the experiments.

### 372 **Immunofluorescent staining**

373 After electrophysiological recording under anesthesia of urethane, rats were  
374 transcardially perfused with pre-warmed normal saline followed by cold 4%  
375 paraformaldehyde in PBS at pH 7.4. Brains were carefully removed and post-fixed in  
376 4% paraformaldehyde for 6 h. Brains were dehydrated in 20% sucrose followed by 30%  
377 sucrose. Tissues were rapidly frozen and cut coronally (50  $\mu$ m). Sections near the  
378 stimulating and recording electrodes were reserved and stored in cryoprotective  
379 solution (150 mM ethylene, 100 mM glycerol, 250 mM PBS) at -20°C. For total tau  
380 and phosphorylated-tau staining, sections were washed three times with PBS for 5  
381 min and then permeabilized with 0.1% Triton X-100 diluted in PBS for 30 min at  
382 room temperature. Then sections were blocked in a PBS solution containing 10%

383 normal goat serum, 3% BSA, 0.1% Triton X-100 for 1 h at room temperature.

384 Sections were incubated respectively with the primary antibodies (**Table S1**) (Tau5,  
385 Cell Signaling Technology, 46687S, 1:200; Tau46, Cell Signaling Technology, 4019S,  
386 1:200; Phospho-Tau (Thr181), Cell Signaling Technology, 12885S, 1:200;  
387 Phospho-Tau (Thr217), ThermoFisher, 44-744, 1:200; Phospho-Tau (Thr231), Abcam,  
388 ab151559, 1:200; Phospho-Tau (Ser202, Thr205), ThermoFisher, MN1020, 1:200;  
389 Phospho-Tau (Ser396), Affinty, AF3148, 1:200) in a humidified chamber overnight at  
390 4°C. After 24 h, sections were washed three times with PBS for 5 min, followed by  
391 incubation with species-specific secondary antibodies conjugated to 488 nm or 568  
392 nm fluorophores (Alexa Fluor® 488, Abcam, 150113, 1:500; Alexa Fluor® 568,  
393 Abcam, 175471, 1:500) for 1 h at room temperature. Sections were subsequently  
394 washed and stained with DAPI solution (Solarbio, C0065) for 10 min at room  
395 temperature. After washing with PBS, sections were mounted on the glass slide with  
396 antifade mountant (Southern Biotech, 0100-20) and then processed for imaging using  
397 an Olympus fluorescent microscope (BX5WI, Olympus, Japan). ImageJ version 1.52a  
398 software (National Institute of Mental Health, Bethesda, Maryland, USA) was used to  
399 analyze the intensity of total tau, p-Tau of immunofluorescent staining.

#### 400 **Western blot**

401 The rats were sacrificed 30 min post-LFS in the LFS-treated group or the same  
402 timeline under urethane anaesthesia in the naïve control group. The whole brain was  
403 taken out and the hippocampus from both sides was separated. Approximately  
404 2-mm-thick hippocampal tissue surrounding the sites of electrodes was kept and

405 frozen immediately in liquid nitrogen and stored at -80°C. The tissues were  
406 homogenized in lysis buffer (10mM Tris-HCl, pH 7.5, 150mM NaCl, and 0.5% Triton  
407 X-100, 0.1mM PMSF) containing 1% protease inhibitor Cocktail (Sigma-Aldrich,  
408 CW2200S) and 1% phosphatase inhibitor Cocktail (Sigma-Aldrich, CW2383S). The  
409 protein concentrations were determined by the BCA Protein Assay Kit (Glpbio,  
410 GK10009), and samples were separated by 10% Tris-glycine SDS-PAGE. The  
411 proteins were transferred onto polyvinylidene fluoride (PVDF) membranes  
412 (Millipore, IPVH00010). Then the membranes were blocked with 5% non-fat milk for  
413 1 h at room temperature. After blocking, the membranes were incubated respectively  
414 with the primary antibodies (**Table S1**) overnight at 4°C. After primary antibody  
415 incubation, the membranes were washed three times in TBST and then incubated with  
416 HRP-conjugated goat anti-rabbit IgG (ZSGB-BIO, ZB-2301, 1:25000) for 2 h at room  
417 temperature. Finally, the target protein bands were visualized with  
418 chemiluminescence reagents (Shanghai Willget Biotech, F03) and then detected with  
419 ProteinSimple System (Hybrid HY8300, FluorChem E system, USA). Quantification  
420 of the protein expression was calculated with ImageJ (version 1.52a).

#### 421 **Pharmacological agents**

422 (R,S)-3-(2-carboxypiperazin-4-yl)propyl-1-phosphonic acid ((±)-CPP, Alomone,  
423 C-175) and 3-((2-methyl-1,3-thiazol-4-yl)ethynyl)pyridine hydrochloride (MTEP  
424 hydrochloride, Abcam, ab120035) were prepared in distilled water and diluted with  
425 saline to the required concentration.

426 Trans-N,N'-(Cyclohexane-1,4-diyl)bis(2-(4-chlorophenoxy) acetamide (ISRIB,

427 Sigma, SML0843) was dissolved in dimethyl sulfoxide (DMSO) with gentle warming  
428 in a 40°C water bath and vortexed until the solution became clear. Then the solution  
429 was diluted in polyethylene glycol 400 (PEG400) with gentle warming in a 40°C  
430 water bath and vortexed. The solution was prepared freshly and diluted in warm saline  
431 (37°C) before injection. 1:1 DMSO and PEG400 in saline was used as vehicle control.  
432 The choice of dose and timing of ISRIB administration was based on previous reports  
433 (Krukowski *et al.*, 2020) and our study of the pharmacokinetics of ISRIB in live rats  
434 (Hu *et al.*, 2022). Four pair-housed relatively aged (17-18-month-old) rats received a  
435 single daily injection of ISRIB (2.5 mg/kg, i.p.) on 3 consecutive days. Then the rats  
436 stayed pair-housed for 18 days after the third injection of ISRIB.

#### 437 **Data analysis**

438 Values are expressed as the mean  $\pm$  s.e.m. For the electrophysiology experiments, the  
439 last 10 min prior to LFS was used to calculate the “Pre” -induction EPSP amplitude.  
440 Unless otherwise stated the magnitude of LTD was measured over the last 10 min at  
441 the end of recording after (“Post”) LFS. To compare between two group, repeated  
442 measures two-way ANOVA with Bonferroni *post hoc* test was used. To compare  
443 between groups of three or more, one-way ANOVA with Bonferroni multiple  
444 comparisons was used. A two-tailed paired Student’s *t*-test (paired *t*) was used to  
445 compare between “Pre” and “Post” within groups. For the immunofluorescence  
446 staining, internal comparison was used. Thus, immunofluorescent staining signal was  
447 quantified in the entire and selected subregions of the ipsilaterally stimulated  
448 hippocampi and the contralateral one from the same animals. The average of the

449 contralateral control was standardized to 1. A two-tailed paired Student's *t*-test was  
450 used to compare between ipsilateral and contralateral. Data of western blotting  
451 between conditions were compared using one-way ANOVA with Bonferroni multiple  
452 comparisons. A value of  $P < 0.05$  was considered statistically significant ( $*P < 0.05$ ,  
453  $**P < 0.01$ ,  $***P < 0.001$ ,  $****P < 0.0001$ ). All data were evaluated and graphed  
454 using Prism 9.0 (GraphPad Inc, San Diego, CA, USA).

#### 455 **Data availability**

456 All raw data supporting the findings of this study are available from the  
457 corresponding author upon reasonable request.

#### 458 **Acknowledgments**

459 This study has been funded by National Natural Science Foundation of China  
460 (U2004134) and Zhengzhou University (140/32310295) to NWH, and by Science  
461 Foundation Ireland (19/FFP/6437 and 14/IA/2571) to MJR. The funders had no role  
462 in study design, data collection and analysis, decision to publish, or preparation of the  
463 manuscript. We thank Professor Seán Kennelly (Tallaght University Hospital, Trinity  
464 College Dublin) and Professor Tim Lynch (Mater Misericordiae University Hospital,  
465 University College Dublin) for advice.

#### 466 **Author contributions**

467 NWH and MJR jointly conceptualized the study and NWH directed experiments; YZ,  
468 ZH, and PY conducted the electrophysiological experiments; YZ, YY, MZ, and SQ  
469 performed immunofluorescent staining; YZ, YY, MZ, and SQ performed Western blot;  
470 BL and JX assisted with Western blot and immunofluorescent staining; All authors

471 contributed to preparing figures and data analysis; NWH wrote the first draft of the  
472 manuscript; All authors contributed to reviewing and editing the manuscript, and  
473 approved its final version.

#### 474 **Conflict of interest**

475 The authors have no competing interests to declare that are relevant to the content of  
476 this article.

#### 477 **Ethics approval**

478 All experiments were performed following the guidelines of the ARRIVE (Animal  
479 Research: Reporting of In Vivo Experiments) guidelines 2.0 (Percie du Sert *et al.*,  
480 2020) and were approved by the Animal Care and Use Committee of Zhengzhou  
481 University, China. All efforts were made to minimize the number of animals used and  
482 their suffering.

483

#### 484 **References**

- 485 Avila J, Diaz-Nido J (2004) Tangling with hypothermia. *Nat Med* 10: 460-461
- 486 Barthelemy NR, Horie K, Sato C, Bateman RJ (2020a) Blood plasma  
487 phosphorylated-tau isoforms track CNS change in Alzheimer's disease. *J Exp Med*  
488 217
- 489 Barthelemy NR, Li Y, Joseph-Mathurin N, Gordon BA, Hassenstab J, Benzinger TLS,  
490 Buckles V, Fagan AM, Perrin RJ, Goate AM *et al* (2020b) A soluble  
491 phosphorylated tau signature links tau, amyloid and the evolution of stages of  
492 dominantly inherited Alzheimer's disease. *Nat Med* 26: 398-407
- 493 Benarroch EE (2018) Glutamatergic synaptic plasticity and dysfunction in Alzheimer  
494 disease: Emerging mechanisms. *Neurology* 91: 125-132
- 495 Braak H, Alafuzoff I, Arzberger T, Kretschmar H, Del Tredici K (2006) Staging of  
496 Alzheimer disease-associated neurofibrillary pathology using paraffin sections and  
497 immunocytochemistry. *Acta Neuropathol* 112: 389-404

- 498 Bramblett GT, Goedert M, Jakes R, Merrick SE, Trojanowski JQ, Lee VM (1993)  
499 Abnormal tau phosphorylation at Ser396 in Alzheimer's disease recapitulates  
500 development and contributes to reduced microtubule binding. *Neuron* 10:  
501 1089-1099
- 502 Braun NJ, Yao KR, Alford PW, Liao D (2020) Mechanical injuries of neurons induce  
503 tau mislocalization to dendritic spines and tau-dependent synaptic dysfunction.  
504 *Proc Natl Acad Sci U S A* 117: 29069-29079
- 505 Bretteville A, Marcouiller F, Julien C, El Khoury NB, Petry FR, Poitras I, Mougnot D,  
506 Levesque G, Hebert SS, Planel E (2012) Hypothermia-induced  
507 hyperphosphorylation: a new model to study tau kinase inhibitors. *Sci Rep* 2: 480
- 508 Brion JP, Smith C, Couck AM, Gallo JM, Anderton BH (1993) Developmental  
509 changes in tau phosphorylation: fetal tau is transiently phosphorylated in a manner  
510 similar to paired helical filament-tau characteristic of Alzheimer's disease. *J*  
511 *Neurochem* 61: 2071-2080
- 512 Buss EW, Corbett NJ, Roberts JG, Ybarra N, Musial TF, Simkin D, Molina-Campos E,  
513 Oh KJ, Nielsen LL, Ayala GD *et al* (2021) Cognitive aging is associated with  
514 redistribution of synaptic weights in the hippocampus. *Proc Natl Acad Sci U S A*  
515 118
- 516 Busse CS, Brodtkin J, Tattersall D, Anderson JJ, Warren N, Tehrani L, Bristow LJ,  
517 Varney MA, Cosford ND (2004) The behavioral profile of the potent and selective  
518 mGlu5 receptor antagonist 3-[(2-methyl-1,3-thiazol-4-yl)ethynyl]pyridine (MTEP)  
519 in rodent models of anxiety. *Neuropsychopharmacology* 29: 1971-1979
- 520 Chang CW, Shao E, Mucke L (2021) Tau: Enabler of diverse brain disorders and  
521 target of rapidly evolving therapeutic strategies. *Science* 371
- 522 Collingridge GL, Peineau S, Howland JG, Wang YT (2010) Long-term depression in  
523 the CNS. *Nat Rev Neurosci* 11: 459-473
- 524 Connor SA, Wang YT (2016) A Place at the Table: LTD as a Mediator of Memory  
525 Genesis. *Neuroscientist* 22: 359-371
- 526 Debanne D, Gahwiler BH, Thompson SM (1998) Long-term synaptic plasticity  
527 between pairs of individual CA3 pyramidal cells in rat hippocampal slice cultures.  
528 *J Physiol* 507 ( Pt 1): 237-247
- 529 Draffin JE, Sanchez-Castillo C, Fernandez-Rodrigo A, Sanchez-Saez X, Avila J,  
530 Wagner FF, Esteban JA (2021) GSK3alpha, not GSK3beta, drives hippocampal  
531 NMDAR-dependent LTD via tau-mediated spine anchoring. *EMBO J* 40: e105513
- 532 Driscoll I, Hamilton DA, Petropoulos H, Yeo RA, Brooks WM, Baumgartner RN,  
533 Sutherland RJ (2003) The aging hippocampus: cognitive, biochemical and  
534 structural findings. *Cereb Cortex* 13: 1344-1351
- 535 Goedert M, Jakes R, Crowther RA, Six J, Lubke U, Vandermeeren M, Cras P,



- 536 Trojanowski JQ, Lee VM (1993) The abnormal phosphorylation of tau protein at  
537 Ser-202 in Alzheimer disease recapitulates phosphorylation during development.  
538 *Proc Natl Acad Sci U S A* 90: 5066-5070
- 539 Gratuze M, El Khoury NB, Turgeon A, Julien C, Marcouiller F, Morin F, Whittington  
540 RA, Marette A, Calon F, Planel E (2017) Tau hyperphosphorylation in the brain of  
541 ob/ob mice is due to hypothermia: Importance of thermoregulation in linking  
542 diabetes and Alzheimer's disease. *Neurobiol Dis* 98: 1-8
- 543 Hansson O (2021) Biomarkers for neurodegenerative diseases. *Nat Med* 27: 954-963
- 544 Hefti MM, Kim S, Bell AJ, Betters RK, Fiock KL, Iida MA, Smalley ME, Farrell K,  
545 Fowkes ME, Crary JF (2019) Tau Phosphorylation and Aggregation in the  
546 Developing Human Brain. *J Neuropathol Exp Neurol* 78: 930-938
- 547 Hou Y, Dan X, Babbar M, Wei Y, Hasselbalch SG, Croteau DL, Bohr VA (2019)  
548 Ageing as a risk factor for neurodegenerative disease. *Nat Rev Neurol* 15: 565-581
- 549 Hu NW, Nicoll AJ, Zhang D, Mably AJ, O'Malley T, Purro SA, Terry C, Collinge J,  
550 Walsh DM, Rowan MJ (2014) mGlu5 receptors and cellular prion protein mediate  
551 amyloid-beta-facilitated synaptic long-term depression in vivo. *Nat Commun* 5:  
552 3374
- 553 Hu Z, Yu P, Zhang Y, Yang Y, Zhu M, Qin S, Xu JT, Duan D, Wu Y, Wang D *et al*  
554 (2022) Inhibition of the ISR abrogates mGluR5-dependent long-term depression  
555 and spatial memory deficits in a rat model of Alzheimer's disease. *Transl*  
556 *Psychiatry* 12: 96
- 557 Ianov L, De Both M, Chawla MK, Rani A, Kennedy AJ, Piras I, Day JJ, Siniard A,  
558 Kumar A, Sweatt JD *et al* (2017) Hippocampal Transcriptomic Profiles: Subfield  
559 Vulnerability to Age and Cognitive Impairment. *Front Aging Neurosci* 9: 383
- 560 Karikari TK, Pascoal TA, Ashton NJ, Janelidze S, Benedet AL, Rodriguez JL,  
561 Chamoun M, Savard M, Kang MS, Therriault J *et al* (2020) Blood phosphorylated  
562 tau 181 as a biomarker for Alzheimer's disease: a diagnostic performance and  
563 prediction modelling study using data from four prospective cohorts. *Lancet*  
564 *Neurol* 19: 422-433
- 565 Kimura T, Whitcomb DJ, Jo J, Regan P, Piers T, Heo S, Brown C, Hashikawa T,  
566 Murayama M, Seok H *et al* (2014) Microtubule-associated protein tau is essential  
567 for long-term depression in the hippocampus. *Philos Trans R Soc Lond B Biol Sci*  
568 369: 20130144
- 569 Kotecha SA, Jackson MF, Al-Mahrouki A, Roder JC, Orser BA, MacDonald JF (2003)  
570 Co-stimulation of mGluR5 and N-methyl-D-aspartate receptors is required for  
571 potentiation of excitatory synaptic transmission in hippocampal neurons. *J Biol*  
572 *Chem* 278: 27742-27749
- 573 Krukowski K, Nolan A, Frias ES, Boone M, Ureta G, Grue K, Paladini MS,

- 574 Elizarraras E, Delgado L, Bernales S *et al* (2020) Small molecule cognitive  
575 enhancer reverses age-related memory decline in mice. *Elife* 9
- 576 Li S, Hong S, Shepardson NE, Walsh DM, Shankar GM, Selkoe D (2009) Soluble  
577 oligomers of amyloid Beta protein facilitate hippocampal long-term depression by  
578 disrupting neuronal glutamate uptake. *Neuron* 62: 788-801
- 579 Liu DD, Yang Q, Li ST (2013) Activation of extrasynaptic NMDA receptors induces  
580 LTD in rat hippocampal CA1 neurons. *Brain Res Bull* 93: 10-16
- 581 Liu F, Iqbal K, Grundke-Iqbal I, Gong CX (2002) Involvement of aberrant  
582 glycosylation in phosphorylation of tau by cdk5 and GSK-3beta. *FEBS Lett* 530:  
583 209-214
- 584 Livingston G, Huntley J, Sommerlad A, Ames D, Ballard C, Banerjee S, Brayne C,  
585 Burns A, Cohen-Mansfield J, Cooper C *et al* (2020) Dementia prevention,  
586 intervention, and care: 2020 report of the Lancet Commission. *Lancet* 396:  
587 413-446
- 588 Lujan R, Nusser Z, Roberts JD, Shigemoto R, Somogyi P (1996) Perisynaptic location  
589 of metabotropic glutamate receptors mGluR1 and mGluR5 on dendrites and  
590 dendritic spines in the rat hippocampus. *Eur J Neurosci* 8: 1488-1500
- 591 Lujan R, Roberts JD, Shigemoto R, Ohishi H, Somogyi P (1997) Differential plasma  
592 membrane distribution of metabotropic glutamate receptors mGluR1 alpha,  
593 mGluR2 and mGluR5, relative to neurotransmitter release sites. *J Chem Neuroanat*  
594 13: 219-241
- 595 Luscher C, Huber KM (2010) Group 1 mGluR-dependent synaptic long-term  
596 depression: mechanisms and implications for circuitry and disease. *Neuron* 65:  
597 445-459
- 598 Magee JC, Grienberger C (2020) Synaptic Plasticity Forms and Functions. *Annu Rev*  
599 *Neurosci* 43: 95-117
- 600 McCamphill PK, Stoppel LJ, Senter RK, Lewis MC, Heynen AJ, Stoppel DC, Sridhar  
601 V, Collins KA, Shi X, Pan JQ *et al* (2020) Selective inhibition of glycogen  
602 synthase kinase 3alpha corrects pathophysiology in a mouse model of fragile X  
603 syndrome. *Sci Transl Med* 12
- 604 McKiernan EC, Marrone DF (2017) CA1 pyramidal cells have diverse biophysical  
605 properties, affected by development, experience, and aging. *PeerJ* 5: e3836
- 606 Mishiba T, Tanaka M, Mita N, He X, Sasamoto K, Itohara S, Ohshima T (2014)  
607 Cdk5/p35 functions as a crucial regulator of spatial learning and memory. *Mol*  
608 *Brain* 7: 82
- 609 Nies SH, Takahashi H, Herber CS, Huttner A, Chase A, Strittmatter SM (2021)  
610 Spreading of Alzheimer tau seeds is enhanced by aging and template matching  
611 with limited impact of amyloid-beta. *J Biol Chem* 297: 101159

- 612 O'Connor A, Karikari TK, Poole T, Ashton NJ, Lantero Rodriguez J, Khatun A, Swift  
613 I, Heslegrave AJ, Abel E, Chung E *et al* (2020) Plasma phospho-tau181 in  
614 presymptomatic and symptomatic familial Alzheimer's disease: a longitudinal  
615 cohort study. *Mol Psychiatry*
- 616 O'Riordan KJ, Hu NW, Rowan MJ (2018a) Ass Facilitates LTD at Schaffer Collateral  
617 Synapses Preferentially in the Left Hippocampus. *Cell Rep* 22: 2053-2065
- 618 O'Riordan KJ, Hu NW, Rowan MJ (2018b) Physiological activation of mGlu5  
619 receptors supports the ion channel function of NMDA receptors in hippocampal  
620 LTD induction in vivo. *Sci Rep* 8: 4391
- 621 Ondrejcek T, Hu NW, Qi Y, Klyubin I, Corbett GT, Fraser G, Perkinson MS, Walsh  
622 DM, Billinton A, Rowan MJ (2019) Soluble tau aggregates inhibit synaptic  
623 long-term depression and amyloid beta-facilitated LTD in vivo. *Neurobiol Dis* 127:  
624 582-590
- 625 Palmqvist S, Tideman P, Cullen N, Zetterberg H, Blennow K, Alzheimer's Disease  
626 Neuroimaging I, Dage JL, Stomrud E, Janelidze S, Mattsson-Carlsson N *et al*  
627 (2021) Prediction of future Alzheimer's disease dementia using plasma  
628 phospho-tau combined with other accessible measures. *Nat Med* 27: 1034-1042
- 629 Papouin T, Ladepeche L, Ruel J, Sacchi S, Labasque M, Hanini M, Groc L, Pollegioni  
630 L, Mothet JP, Oliet SH (2012) Synaptic and extrasynaptic NMDA receptors are  
631 gated by different endogenous coagonists. *Cell* 150: 633-646
- 632 Peineau S, Taghibiglou C, Bradley C, Wong TP, Liu L, Lu J, Lo E, Wu D, Saule E,  
633 Bouschet T *et al* (2007) LTP inhibits LTD in the hippocampus via regulation of  
634 GSK3beta. *Neuron* 53: 703-717
- 635 Percie du Sert N, Hurst V, Ahluwalia A, Alam S, Avey MT, Baker M, Browne WJ,  
636 Clark A, Cuthill IC, Dirnagl U *et al* (2020) The ARRIVE guidelines 2.0: Updated  
637 guidelines for reporting animal research. *PLoS Biol* 18: e3000410
- 638 Planel E, Miyasaka T, Launey T, Chui DH, Tanemura K, Sato S, Murayama O,  
639 Ishiguro K, Tatebayashi Y, Takashima A (2004) Alterations in glucose metabolism  
640 induce hypothermia leading to tau hyperphosphorylation through differential  
641 inhibition of kinase and phosphatase activities: implications for Alzheimer's  
642 disease. *J Neurosci* 24: 2401-2411
- 643 Potier B, Billard JM, Riviere S, Sinet PM, Denis I, Champeil-Potokar G, Grintal B,  
644 Jouvenceau A, Kollen M, Dutar P (2010) Reduction in glutamate uptake is  
645 associated with extrasynaptic NMDA and metabotropic glutamate receptor  
646 activation at the hippocampal CA1 synapse of aged rats. *Aging Cell* 9: 722-735
- 647 Regan P, Piers T, Yi JH, Kim DH, Huh S, Park SJ, Ryu JH, Whitcomb DJ, Cho K  
648 (2015) Tau phosphorylation at serine 396 residue is required for hippocampal LTD.  
649 *J Neurosci* 35: 4804-4812

- 650 Sarantis K, Tsiamaki E, Kouvaros S, Papatheodoropoulos C, Angelatou F (2015)  
651 Adenosine A(2)A receptors permit mGluR5-evoked tyrosine phosphorylation of  
652 NR2B (Tyr1472) in rat hippocampus: a possible key mechanism in NMDA  
653 receptor modulation. *J Neurochem* 135: 714-726
- 654 Sato C, Barthelemy NR, Mawuenyega KG, Patterson BW, Gordon BA,  
655 Jockel-Balsarotti J, Sullivan M, Crisp MJ, Kasten T, Kirmess KM *et al* (2018) Tau  
656 Kinetics in Neurons and the Human Central Nervous System. *Neuron* 97:  
657 1284-1298 e1287
- 658 Sindou P, Lesort M, Couratier P, Yardin C, Esclaire F, Hugon J (1994) Glutamate  
659 increases tau phosphorylation in primary neuronal cultures from fetal rat cerebral  
660 cortex. *Brain Res* 646: 124-128
- 661 Sun XY, Tuo QZ, Liuyang ZY, Xie AJ, Feng XL, Yan X, Qiu M, Li S, Wang XL, Cao  
662 FY *et al* (2016) Extrasynaptic NMDA receptor-induced tau overexpression  
663 mediates neuronal death through suppressing survival signaling ERK  
664 phosphorylation. *Cell Death Dis* 7: e2449
- 665 Tackenberg C, Grinschgl S, Trutzel A, Santuccione AC, Frey MC, Konietzko U,  
666 Grimm J, Brandt R, Nitsch RM (2013) NMDA receptor subunit composition  
667 determines beta-amyloid-induced neurodegeneration and synaptic loss. *Cell Death*  
668 *Dis* 4: e608
- 669 Taylor HBC, Emptage NJ, Jeans AF (2021) Long-term depression links amyloid-beta  
670 to the pathological hyperphosphorylation of tau. *Cell Rep* 36: 109638
- 671 Teunissen CE, Verberk IMW, Thijssen EH, Vermunt L, Hansson O, Zetterberg H, van  
672 der Flier WM, Mielke MM, Del Campo M (2022) Blood-based biomarkers for  
673 Alzheimer's disease: towards clinical implementation. *Lancet Neurol* 21: 66-77
- 674 Veldsman M, Nobis L, Alfaro-Almagro F, Manohar S, Husain M (2021) The human  
675 hippocampus and its subfield volumes across age, sex and APOE e4 status. *Brain*  
676 *Commun* 3: fcaa219
- 677 Vieira M, Yong XLH, Roche KW, Anggono V (2020) Regulation of NMDA glutamate  
678 receptor functions by the GluN2 subunits. *J Neurochem*
- 679 Wegmann S, Bennett RE, Delorme L, Robbins AB, Hu M, McKenzie D, Kirk MJ,  
680 Schiantarelli J, Tunio N, Amaral AC *et al* (2019) Experimental evidence for the age  
681 dependence of tau protein spread in the brain. *Sci Adv* 5: eaaw6404
- 682 Wegmann S, Biernat J, Mandelkow E (2021) A current view on Tau protein  
683 phosphorylation in Alzheimer's disease. *Curr Opin Neurobiol* 69: 131-138
- 684 Wesseling H, Mair W, Kumar M, Schlaffner CN, Tang S, Beerepoot P, Fatou B, Guise  
685 AJ, Cheng L, Takeda S *et al* (2020) Tau PTM Profiles Identify Patient  
686 Heterogeneity and Stages of Alzheimer's Disease. *Cell* 183: 1699-1713 e1613
- 687 Wu JW, Hussaini SA, Bastille IM, Rodriguez GA, Mrejeru A, Rilett K, Sanders DW,

688 Cook C, Fu H, Boonen RA *et al* (2016) Neuronal activity enhances tau propagation  
689 and tau pathology in vivo. *Nat Neurosci* 19: 1085-1092

690 Yu Y, Run X, Liang Z, Li Y, Liu F, Liu Y, Iqbal K, Grundke-Iqbal I, Gong CX (2009)  
691 Developmental regulation of tau phosphorylation, tau kinases, and tau  
692 phosphatases. *J Neurochem* 108: 1480-1494

693

694

695 **Supporting Information Listing**

696 Table S1: Antibodies used in this study

697 Figure S1-11 and legends

698

699 **Figure legends**

700 **Figure 1 LFS promotes p-Tau181 in an age-dependent manner in live rats. (a)**

701 Schematic of the field EPSPs recording configuration in CA1 stratum radiatum (REC)

702 overlaid with a schematic of a bipolar stimulation electrode (STIM) for Schaffer

703 collateral axon fibers (black) in ipsilateral hemisphere. Additional excitatory

704 projections from CA3 include local recurrent connections (blue) of CA3 pyramidal

705 cells onto other CA3 pyramidal cells, and the back projection (pink) of CA3

706 pyramidal neurons to the dentate gyrus (DG). (b) Application of LFS (horizontal bar,

707 LFS-900; 900 pulses at 1Hz) induced robust LTD at CA3-CA1 synapses in

708 anaesthetized rats at two different ages (2-3-month, and 17-18-month). Calibration

709 bars: vertical, 2 mV; horizontal, 10 ms. (c) Summarized EPSP amplitude 30 min post

710 LFS. The EPSP decreased to  $63.8 \pm 7.8\%$  in 2-3-month-old rats ( $n = 5$ ,  $P = 0.0147$

711 compared with Pre), and  $62.4 \pm 3.4\%$  in 17-18-month-old rats ( $n = 7$ ,  $P < 0.0001$

712 compared with Pre) respectively; paired *t* test. The amplitude of LTD is comparable in

713 both groups (two-way ANOVA, age,  $F(1, 10) = 0.09427$ ,  $P = 0.7651$ ). (d) The upper

714 panel shows p-Tau181 (red) immunofluorescent staining in dorsal hippocampus

715 (Scale bar: 200  $\mu\text{m}$ ), CA1, CA3, and hilus of DG (scale bars: 50  $\mu\text{m}$ ) from

716 2-3-month-old rats. The corresponding statistical results compared with contralateral

717 side are displayed in the lower panel. The expression level of p-Tau181 was not

718 affected by LFS in dorsal hippocampus ( $P = 0.4611$ ), CA1 ( $P = 0.3792$ ), CA3 ( $P =$

719  $0.6842$ ), and DG ( $P = 0.1953$ ); paired *t* test. (e) Immunofluorescent staining of

720 p-Tau181 (red) in ipsilateral dorsal hippocampus, CA1, CA3, and DG from  
721 17-18-month-old rats. LTD induction by LFS significantly enhanced the level of  
722 p-Tau181 in dorsal hippocampus ( $P < 0.0001$ ), CA1 ( $P = 0.0220$ ), CA3 ( $P = 0.0059$ ),  
723 and DG ( $P = 0.0202$ ); paired  $t$  test. Values are mean  $\pm$  s.e.m.

724 **Figure 2 LFS promotes p-Tau217 in an age-dependent manner in live rats.** (a)

725 The upper panel shows immunofluorescent staining of p-Tau217 (red) in dorsal  
726 hippocampus (Scale bar: 200  $\mu$ m), CA1, CA3, and DG (scale bars: 50  $\mu$ m) from  
727 2-3-month-old rats. The corresponding mean fluorescence intensities were  
728 summarized in the lower panel. LFS did not affect the expression level of p-Tau217 in  
729 dorsal hippocampus ( $P = 0.3820$ ), CA1 ( $P = 0.4488$ ), CA3 ( $P = 0.3409$ ), and DG ( $P =$   
730  $0.1567$ ); paired  $t$  test. (b) Immunofluorescent staining of p-Tau217 (red) in dorsal  
731 hippocampus, CA1, CA3, and DG from 17-18-month-old rats. LFS ipsilaterally  
732 enhanced the level of p-Tau217 in dorsal hippocampus ( $P < 0.0019$ ), CA1 ( $P =$   
733  $0.0153$ ), CA3 ( $P = 0.0003$ ), and DG ( $P = 0.0251$ ); paired  $t$  test. Values are mean  $\pm$   
734 s.e.m.

735 **Figure 3 LFS enhances p-Tau181 and p-Tau217 in aged rats.** (a) Application of

736 LFS-900 induced robust LTD at CA3-CA1 synapses in anaesthetized

737 17-18-month-old rats. Calibration bars: vertical, 2 mV; horizontal, 10 ms. (b)

738 Summarized EPSP amplitude 30 min post LFS. The EPSP decreased to  $54.8 \pm 10.2\%$

739 ( $n = 5$ ,  $P = 0.0110$  compared with Pre, paired  $t$ ). (c) Left panels show representative

740 blotting band of p-Tau181 and total tau (Tau5) in the hippocampus of age-matched



741 naïve control group and the experimental group either contralateral or ipsilateral to  
742 LFS. Statistical results of p-Tau181 over total tau was quantified and normalized to  
743 naïve control (n = 5 per group, ipsilateral vs naïve,  $P = 0.0292$ ; contralateral vs naïve,  
744  $P = 0.5075$ ; contralateral vs ipsilateral,  $P = 0.4022$ ; one-way ANOVA-Bonferroni). (d)  
745 Left panels show representative blotting band of p-Tau217 and total tau (tau5) in  
746 age-matched naïve control group, contralateral hippocampus, and ipsilaterally  
747 stimulated hippocampus. Statistical results of p-Tau217 over total tau was quantified  
748 and normalized to naïve control (n = 5 per group, ipsilateral vs naïve,  $P = 0.0049$ ;  
749 contralateral vs naïve,  $P = 0.0979$ ; contralateral vs ipsilateral,  $P = 0.3905$ ; one-way  
750 ANOVA-Bonferroni). Values are mean  $\pm$  s.e.m.

751 **Figure 4 Antagonists of either NMDA receptors or mGluR5 prevent the elevation**  
752 **of both p-Tau181 and p-Tau217 induced by LFS in aged rats. (a)** Systemic  
753 injection of competitive NMDAR antagonist CPP (10 mg/kg, i.p.) alone 1 h prior to  
754 the application of LFS did not affect LTD induction in 17-18-month-old rats.  
755 Similarly, intraperitoneal injection of the mGluR5 negative allosteric modulator  
756 MTEP (3 mg/kg) alone 1 h did not affect LTD induction by LFS 1 h later in 17-18m  
757 old rats. Calibration bars: vertical, 2 mV; horizontal, 10 ms. **(b)** Summary of the mean  
758 EPSP amplitude pre and post -LFS. The EPSP decreased to  $70.2 \pm 2.5\%$  (n = 6,  $P <$   
759  $0.0001$  compared with pre, paired  $t$  test) and  $79.6 \pm 3.7\%$  (n = 5,  $P = 0.0068$  compared  
760 with pre, paired  $t$  test) 30 min post-LFS in CPP or MTEP treated rats respectively  
761 (two-way RM ANOVA, Treatment  $F_{1,9} = 6.999$ ,  $P = 0.0267$ ). **(c)** The upper panel

762 shows the fluorescent images of p-Tau181 labeling (red) and the lower panel displays  
763 the corresponding statistical results in CPP-treated 17-18-month-old rats (Scale bar =  
764 200  $\mu\text{m}$  in dorsal hippocampus; scale bars = 50  $\mu\text{m}$  in CA1, CA3 and DG regions).  
765 LTD induction by LFS did not affect the level of p-Tau181 in dorsal dorsal  
766 hippocampus ( $P = 0.1218$ ), CA3 ( $P = 0.6147$ ), and DG ( $P = 0.0578$ ) except for CA1  
767 region ( $P = 0.0353$ ); paired  $t$  test. **(d)** The upper panel shows the fluorescent images  
768 of p-Tau217 labeling (red) and the corresponding statistical results are displayed in  
769 the lower panel in CPP-treated 17-18-month-old rats. No significant difference was  
770 found in p-Tau217 level compared with that in contralateral dorsal hippocampus ( $P =$   
771  $0.8075$ ), CA1 ( $P = 0.0920$ ), CA3 ( $P = 0.5811$ ), and DG ( $P = 0.7041$ ); paired  $t$  test. **(e)**  
772 In MTEP-treated aged rats, LFS failed to promote the level of p-Tau181 (red as  
773 showed in the upper panel). Summarized mean fluorescence intensities (fold to  
774 contralateral) in dorsal hippocampus ( $P = 0.9154$ ), CA1 ( $P = 0.3161$ ), CA3 ( $P =$   
775  $0.1839$ ), and DG ( $P = 0.8417$ ); paired  $t$  test. **(f)** MTEP treatment also prevented the  
776 enhancement of p-Tau217 by LFS in aged rats. The upper panel showed the  
777 fluorescent images of p-Tau217 (red). The corresponding statistical results were  
778 displayed in the lower panel and no significant difference was found in dorsal  
779 hippocampus ( $P = 0.7702$ ), CA1 ( $P = 0.1598$ ), CA3 ( $P = 0.2262$ ), and DG ( $P =$   
780  $0.5311$ ); paired  $t$  test. Values are mean  $\pm$  s.e.m.

781 **Figure 5 ISRIB blocks LFS-induced enhancement of p-Tau181 and p-Tau217 in**  
782 **aged rats.** (a) Experimental paradigm for ISRIB injection and electrophysiology

783 experiments. ISRIB (2.5 mg/kg, i.p.) was systemically injected for 3 days and *in vivo*  
784 electrophysiology experiments were performed 18 days after the last injection. (b)  
785 LFS induced robust LTD in ISRIB-treated aged rats. Calibration bars: vertical, 2 mV;  
786 horizontal, 10 ms. (c) The EPSP decreased to  $81.8 \pm 2.7\%$  at 30 min post LFS ( $n = 4$ ,  
787  $P = 0.0211$  compared with pre, paired  $t$  test). (d) Treatment of ISRIB completely  
788 prevented the increase of p-Tau181 induced by LFS in aged rats. The upper panel  
789 showed the fluorescent images of p-Tau181 labeling (red). As summarized in the  
790 lower panel, no significant difference was found in the dorsal hippocampus ( $P =$   
791  $0.0579$ ), CA1 ( $P = 0.7006$ ), CA3 ( $P = 0.0715$ ), and DG ( $P = 0.2696$ ); paired  $t$  test. (e)  
792 Treatment of ISRIB also successfully blocked the enhancement of p-Tau217 induced  
793 by LFS in aged rats. The upper panel showed the fluorescent images of p-Tau217  
794 labeling (red). Summarized statistic results in the lower panel displayed no significant  
795 difference in all regions including dorsal hippocampus ( $P = 0.1185$ ), CA1 ( $P =$   
796  $0.9049$ ), CA3 ( $P = 0.9172$ ), and DG ( $P = 0.6636$ ); paired  $t$  test. Scale bar = 200  $\mu\text{m}$  in  
797 hippocampus, scale bar = 50  $\mu\text{m}$  in CA1, CA3 and DG regions. Values are mean  $\pm$   
798 s.e.m.  
799

800 **Figures**

**Fig 1**

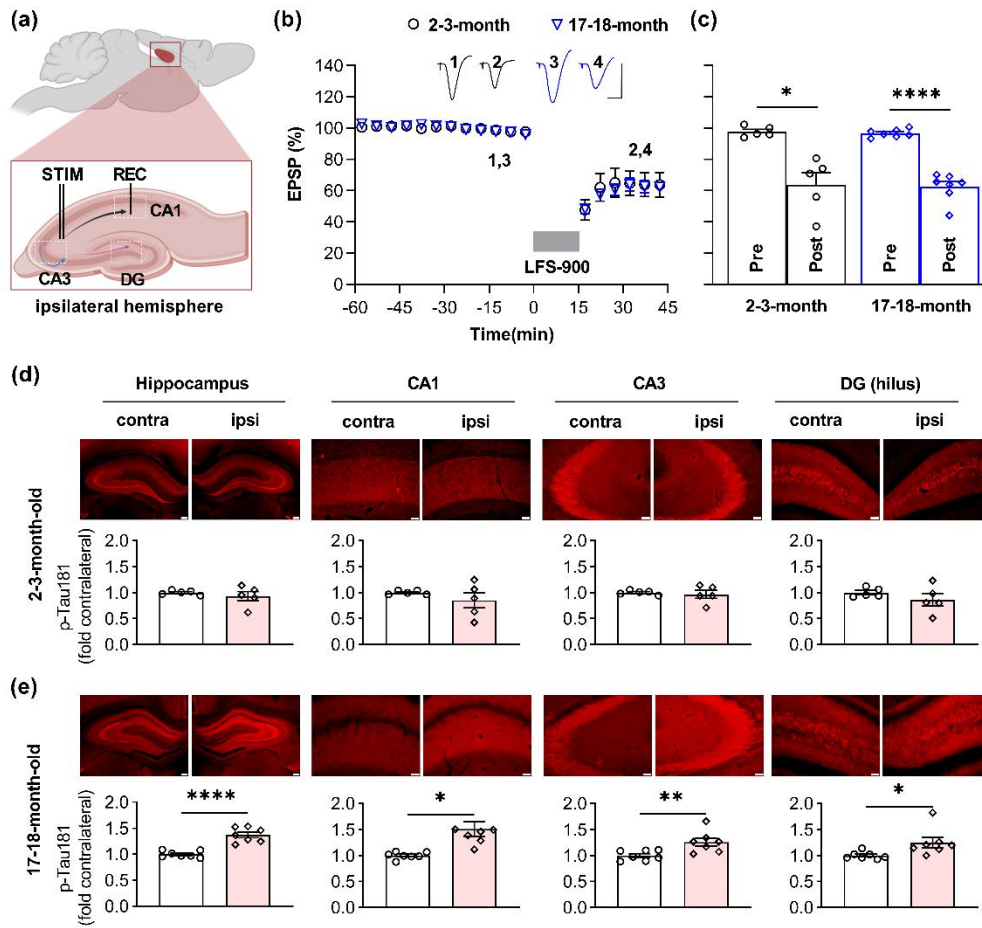

801

802

**Fig 2**

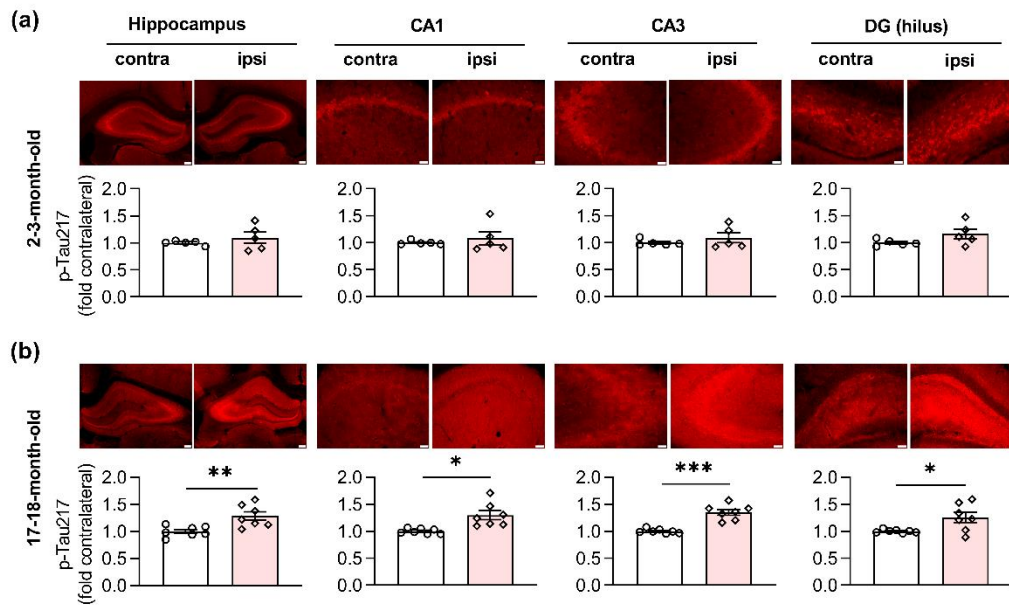

803

804

**Fig 3**

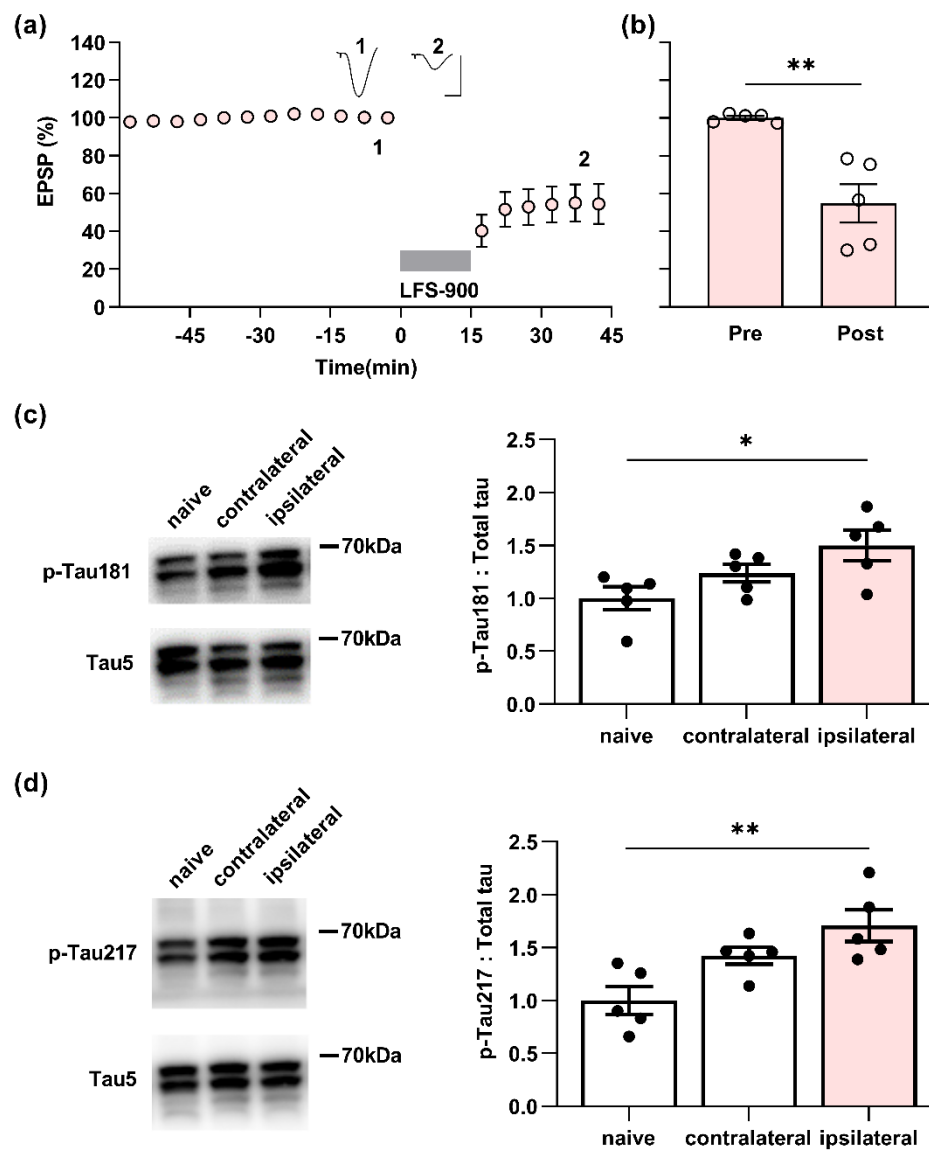

805

806

**Fig 4**

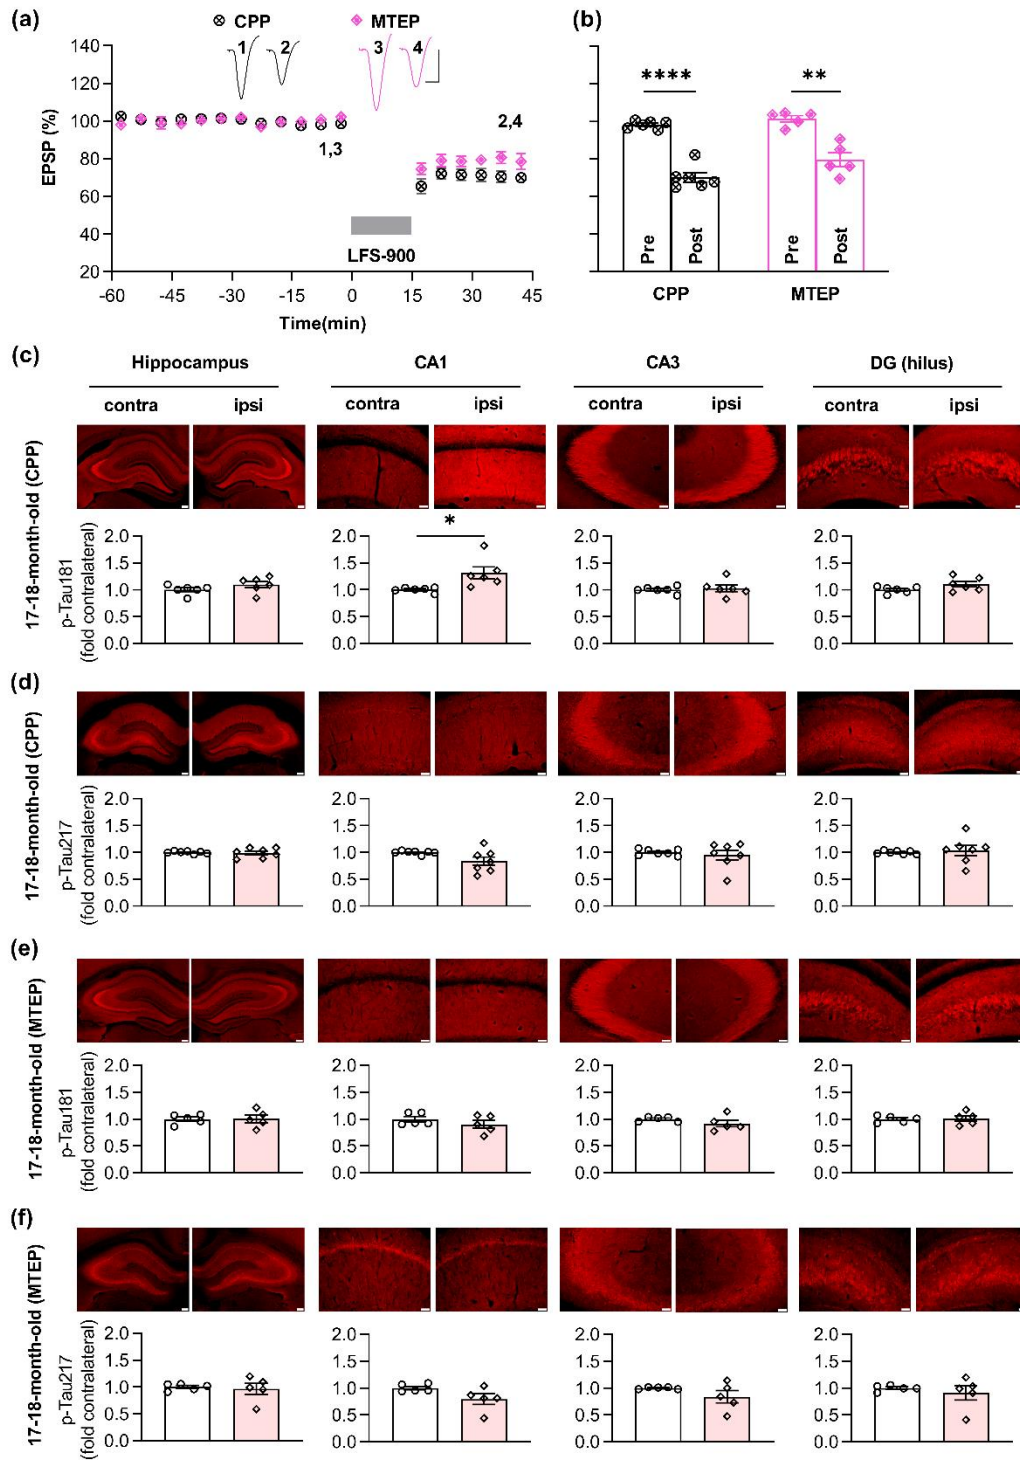

807

808

**Fig 5**

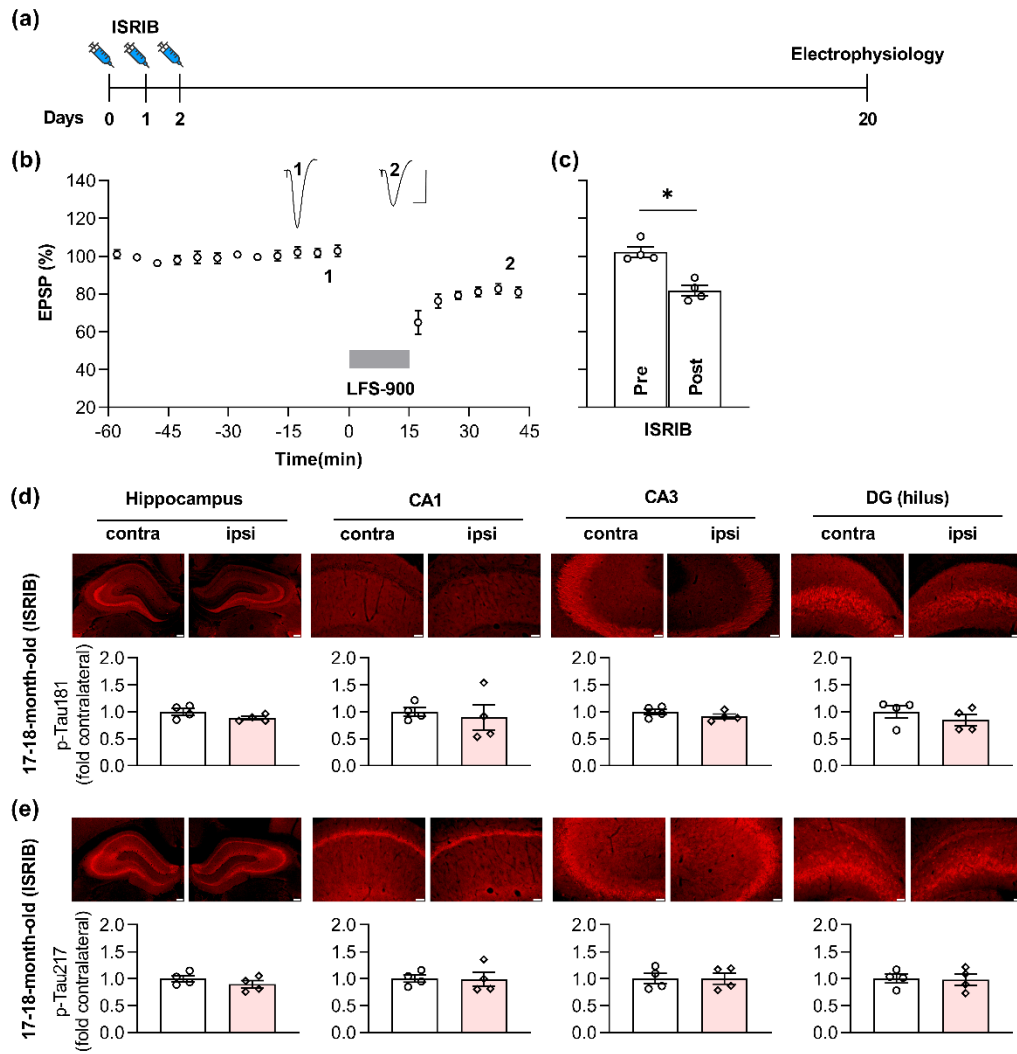

809
